# Supplementary material for: Tuning the electrical memory characteristics from WORM to flash by α- and β-substitution of the electron-donating naphthylamine moieties in functional polyimides
Source: Royal Society of Chemistry journal article supplement (doi:10.1039/c3tc31369g), 2013-01-01
Supplement: c3tc31369g.pdf [file c3tc31369g.pdf]

Supporting information for

## **Tuning the electrical memory characteristics from WORM to flash by $\alpha$ - and $\beta$ -substitution of the electron-donating naphthylamine moieties in functional polyimides**

*Lei Shi, Hebo Ye, Wenlu Liu, Guofeng Tian, Shengli Qi\*, and Dezhen Wu*

[\*] Dr. Shengli Qi

State Key Laboratory of Chemical Resource Engineering, Beijing University of Chemical  
Technology, Beijing 100029 (China).

E-mail: [qisl@mail.buct.edu.cn](mailto:qisl@mail.buct.edu.cn)

### List of Contents for Supplementary Material:

- Figure S1.**  $^1\text{H}$  NMR spectra of the synthesized 6F- $\alpha$ NA and 6F- $\beta$ NA polyimides measured in  $\text{CDCl}_3$ .
- Figure S2.** (a) TGA curves of the synthesized 6F- $\alpha$ NA and 6F- $\beta$ NA polyimides measured in nitrogen atmospheres at a heating rate of  $10\text{ }^\circ\text{C min}^{-1}$ ; (b) DSC curves of the synthesized 6F- $\alpha$ NA and 6F- $\beta$ NA polyimides undertaken at a heating rate of  $20\text{ }^\circ\text{C min}^{-1}$  in nitrogen atmospheres.
- Figure S3.** Current-voltage (I-V) characteristics of the ITO | Thin 6F- $\alpha$ NA PI Layer | Au sandwich devices with different film thickness. The sequence and direction of each sweep are indicated by the respective number and arrow: (a) 15 nm; (b) 30 nm; (c) 100 nm; (d) 140 nm.
- Figure S4.** Current-voltage (I-V) characteristics of the ITO | Thin 6F- $\beta$ NA Layer | Au sandwich devices with different film thicknesses. The sequence and direction of each sweep are indicated by the respective number and arrow: (a) 30 nm; (b) 100 nm; (c) 140 nm.
- Figure S5.** (a) Current-voltage (I-V) characteristics of the ITO | Thin 6F- $\alpha$ NA PI Layer | Al sandwich device with an initial positive voltage sweep. The sequence and direction of each sweep are indicated by the respective number and arrow. (b) Current-voltage (I-V) characteristics of the ITO | Thin 6F- $\alpha$ NA PI Layer | Al sandwich device with an initial negative voltage sweep.
- Figure S6.** Current-voltage (I-V) characteristics of the ITO | Thin 6F- $\beta$ NA PI Layer | Al sandwich device with an initial positive voltage sweep. The sequence and direction of each sweep are indicated by the respective number and arrow.
- Table S1.** Molecular simulation results for the components of the 6F- $\alpha$ NA PI and 6F- $\beta$ NA PI based on B3PW91/6-31G(d) model chemistry.

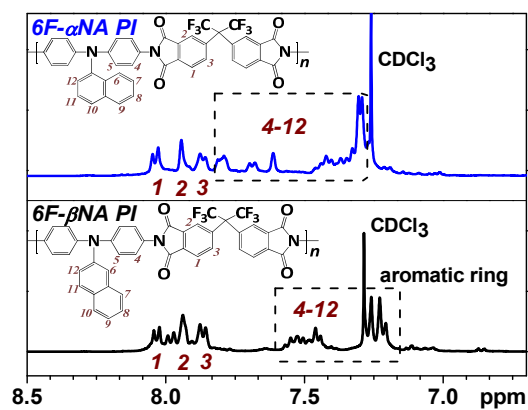

**Figure S1.** <sup>1</sup>H NMR spectra of the synthesized 6F- $\alpha$ NA and 6F- $\beta$ NA polyimides measured in CDCl<sub>3</sub>.

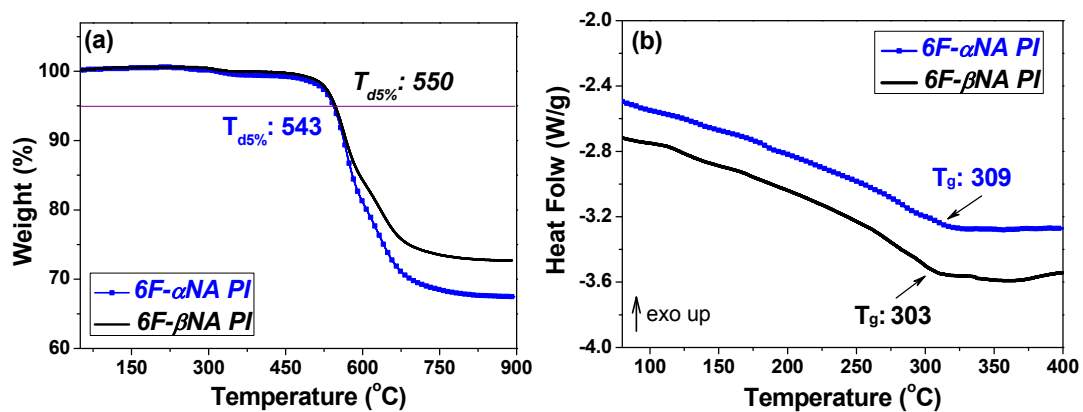

**Figure S2.** (a) TGA curves of the synthesized 6F- $\alpha$ NA and 6F- $\beta$ NA polyimides measured in nitrogen atmospheres at a heating rate of 10 °C min<sup>-1</sup>; (b) DSC curves of the synthesized 6F- $\alpha$ NA and 6F- $\beta$ NA polyimides undertaken at a heating rate of 20 °C min<sup>-1</sup> in nitrogen atmospheres.

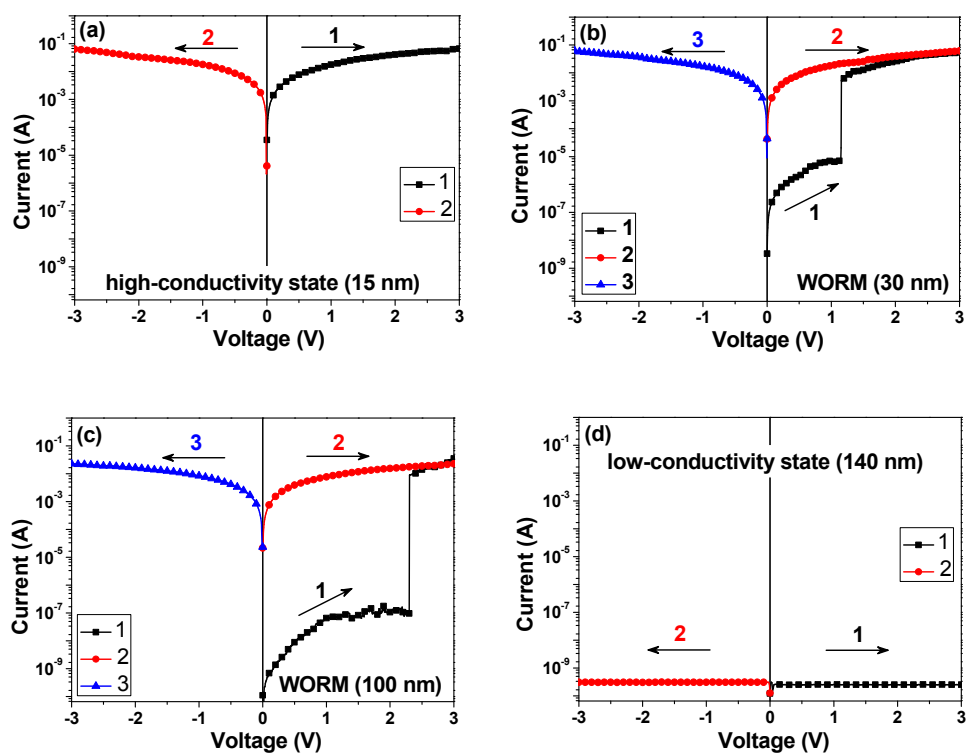

**Figure S3.** Current-voltage (I-V) characteristics of the ITO | Thin 6F- $\alpha$ NA PI Layer | Au sandwich devices with different film thicknesses. The sequence and direction of each sweep are indicated by the respective number and arrow: (a) 15 nm; (b) 30 nm; (c) 100 nm; (d) 140 nm.

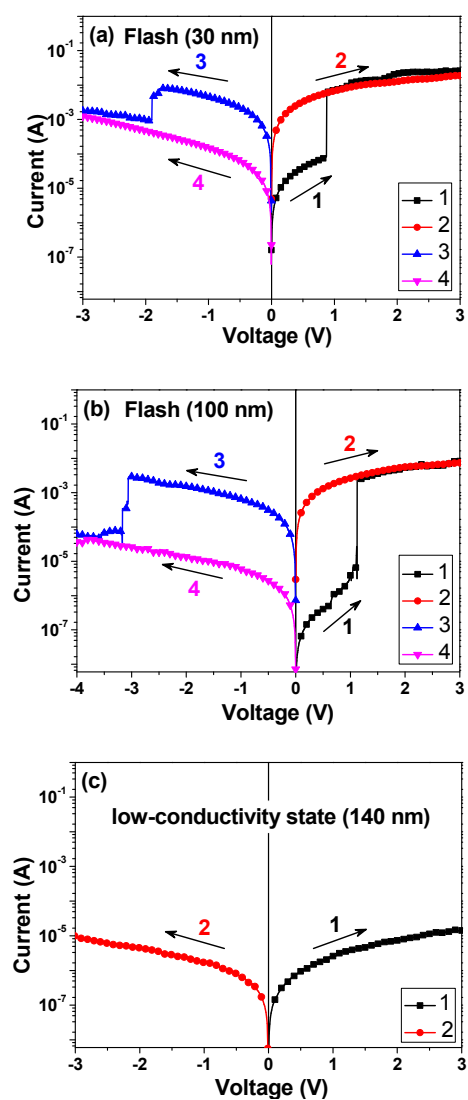

**Figure S4.** Current-voltage (I-V) characteristics of the ITO | Thin 6F- $\beta$ NA Layer | Au sandwich devices with different film thicknesses. The sequence and direction of each sweep are indicated by the respective number and arrow: **(a)** 30 nm; **(b)** 100 nm; **(c)** 140 nm.

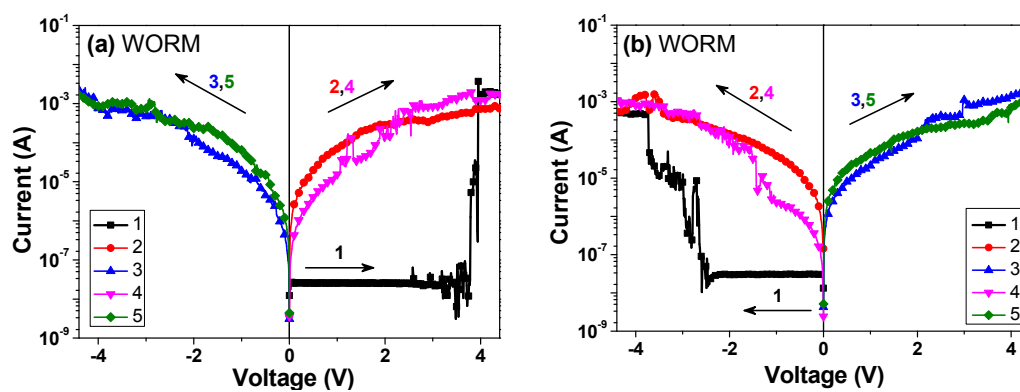

**Figure S5.** (a) Current-voltage (I-V) characteristics of the ITO | Thin 6F- $\alpha$ NA PI Layer | Al sandwich device with an initial positive voltage sweep. The sequence and direction of each sweep are indicated by the respective number and arrow. (b) Current-voltage (I-V) characteristics of the ITO | Thin 6F- $\alpha$ NA PI Layer | Al sandwich device with an initial negative voltage sweep.

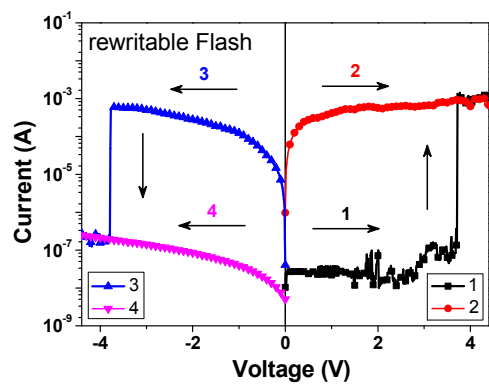

**Figure S6.** Current-voltage (I-V) characteristics of the ITO | Thin 6F- $\beta$ NA PI Layer | Al sandwich device with an initial positive voltage sweep. The sequence and direction of each sweep are indicated by the respective number and arrow.

**Table S1.** Molecular simulation results for the components of the 6F- $\alpha$ NA PI and 6F- $\beta$ NA PI based on B3PW91/6-31G(d) model chemistry.

| Components | DAP $\alpha$ NA                                                                                 | DAP $\beta$ NA                                                                                  | 6FDA                                                                                            | 6F- $\alpha$ NA PI (model compound 1)                                                          | 6F- $\beta$ NA PI (model compound 2)                                                          |
|------------|-------------------------------------------------------------------------------------------------|-------------------------------------------------------------------------------------------------|-------------------------------------------------------------------------------------------------|------------------------------------------------------------------------------------------------|-----------------------------------------------------------------------------------------------|
| HOMO level | 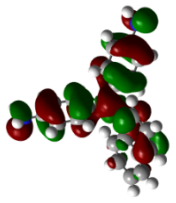<br>-4.55 eV | <br>-4.59 eV | <br>-8.28 eV | <br>-5.37 eV | <br>-5.27 eV |
| LUMO level | <br>-0.79 eV | <br>-0.65 eV | <br>-2.98 eV | <br>-2.22 eV | <br>-2.24 eV |
| Energy gap | 3.76 eV                                                                                         | 3.94 eV                                                                                         | 5.30 eV                                                                                         | 3.15 eV                                                                                        | 3.03 eV                                                                                       |
